# Supplementary material for: A screening instrument to identify ulcerative colitis patients with the high possibility of current non-adherence to aminosalicylate medication based on the Health Belief Model: a cross-sectional study
Source: Springer Nature journal article supplement (doi:10.1186/s12876-014-0220-z), 2014-12-01
Supplement: MOESM1 [file 9738078]

Additional file 1

The screening instrument to identify UC patients with a high possibility of current non-adherence to aminosalicylate medication

|                                                                                                           | Never | Rarely    | Unsure | Somewhat  | Definitely |
|-----------------------------------------------------------------------------------------------------------|-------|-----------|--------|-----------|------------|
| <b>Susceptibility</b>                                                                                     |       |           |        |           |            |
| I think it would be easy to flare up with my current adherence.                                           | 24    | 18        | 12     | 6         | 0          |
| <b>Severity</b>                                                                                           |       |           |        |           |            |
| I think that relapse would have an enormous impact on my daily life including work, school, or housework. | 36    | 27        | 18     | 9         | 0          |
| <b>Benefits</b>                                                                                           |       |           |        |           |            |
| I think I will reduce the risk of relapse if I take it as instructed.                                     | 4     | 3         | 2      | 1         | 0          |
| I think I will reduce the possibility to develop colon cancer if I take it as instructed.                 | 4     | 3         | 2      | 1         | 0          |
| <b>Barrier</b>                                                                                            |       |           |        |           |            |
| I miss the scheduled time to take it when I am busy at work, school, or with housework.                   | 0     | 1         | 2      | 3         | 4          |
| I forget to carry it around when I go out.                                                                | 0     | 1         | 2      | 3         | 4          |
| I miss the scheduled time to take it when I eat meals at irregular hours.                                 | 0     | 1         | 2      | 3         | 4          |
| I feel less need to have to take it.                                                                      | 0     | 1         | 2      | 3         | 4          |
| I hesitate to take it in front of others.                                                                 | 0     | 1         | 2      | 3         | 4          |
| I feel anxious that it may cause unpleasant side effects.                                                 | 4     | 3         | 2      | 1         | 0          |
| I feel anxious about long term-side effects.                                                              | 4     | 3         | 2      | 1         | 0          |
| I feel anxious about unpleasant side effects when my condition becomes worse.                             | 4     | 3         | 2      | 1         | 0          |
| It is difficult to take so many pills.                                                                    | 4     | 3         | 2      | 1         | 0          |
| It is difficult to swallow such large pills.                                                              | 4     | 3         | 2      | 1         | 0          |
| It is difficult to take it so many times.                                                                 | 4     | 3         | 2      | 1         | 0          |
| It is difficult to take it for a long time.                                                               | 4     | 3         | 2      | 1         | 0          |
| <b>Cues to action</b>                                                                                     |       |           |        |           |            |
| I can talk to healthcare providers about my anxiety or worries about it.                                  | 4     | 3         | 2      | 1         | 0          |
| I am encouraged by healthcare providers or my family to take it as instructed.                            | 4     | 3         | 2      | 1         | 0          |
| Healthcare providers or my family check whether I took it as instructed.                                  | 4     | 3         | 2      | 1         | 0          |
| Visible bleeding                                                                                          | 0.    | Presence  | 10.    | Absence   |            |
| Current thiopurines                                                                                       | 0.    | Presence  | 8.     | Absence   |            |
| Daily number of aminosalicylate tablets                                                                   | 0.    | 9 or more | 7.     | 8 or less |            |

The range of this model is from 0 to 153. A patient whose scores more than 60 is believed to have a high possibility of current non-adherence.
